28 **ABSTRACT**

29 Beyond the regulation of cardiovascular function, baroreceptor afferents play polymodal  
30 roles. We hypothesized that baroreceptor denervation affects lipopolysaccharide (LPS)-  
31 induced systemic inflammation (SI) and hemodynamic collapse in conscious rats, and  
32 that these parameters are interconnected. We combine: a) hemodynamic and  
33 thermoregulatory recordings after LPS administration at a septic-like dose b) analysis of  
34 the cardiovascular complexity, c) evaluation of vascular function in mesenteric  
35 resistance vessels, and d) measurements of inflammatory cytokines (plasma and spleen).  
36 LPS-induced drop in blood pressure was higher in sino-aortic denervated (SAD) rats.  
37 LPS-induced hemodynamic collapse was associated with SAD-dependent autonomic  
38 disbalance. LPS-induced vascular dysfunction was not affected by SAD. Surprisingly,  
39 SAD blunted LPS-induced surges of plasma and spleen cytokines. These data indicate  
40 that sino-aortic afferents are key to alleviate LPS-induced cardiovascular collapse,  
41 affecting the autonomic cardiovascular control, without affecting resistance blood  
42 vessels. Moreover, baroreflex modulation of the LPS-induced SI and hemodynamic  
43 collapse seem not to be interconnected.

44

45

46

47

48

49

50

51

52

53

54

55

56

## 57 **Introduction**

58           Sepsis is a common disorder affecting 31.5 million people worldwide, with a  
59 mortality rate of 5.3 million deaths every year (1). Considering the severity of sepsis  
60 and its pathophysiological complications, different research groups have focused on the  
61 study of mechanisms of systemic inflammation (SI) in search of therapeutic strategies  
62 help manage signs and symptoms for the treatment of this condition (2–4). Systemic  
63 administration of lipopolysaccharide (LPS) has been widely used in animal models to  
64 induce changes observed during SI, such as exacerbated production and release of  
65 cytokines, catecholamines, hormones and nitric oxide (NO), associated with  
66 hypotension, tachycardia, and hypothermia followed by fever (5–9). These  
67 hemodynamic and thermoregulatory responses to LPS are similar to those observed in  
68 humans with sepsis (10).

69           Classically, baroreceptor afferents are specialized structures in the homeostatic  
70 control of blood pressure in health and disease (11,12). Baroreceptors afferents integrity  
71 is mandatory in the control of blood pressure within a narrow range of variation and  
72 surgically removed baroreceptors afferents rats [sino-aortic denervation (SAD)] had  
73 higher variability of the mean arterial pressure (11,13,14). More recently, it has been  
74 shown the role of baroreceptor afferents mediating LPS-induced cardiovascular collapse  
75 (15–18). Moreover, in SI, electrical baroreflex stimulation in rats has been reported to  
76 blunt LPS-induced production of cytokines in the hypothalamus (19), indicating an anti-  
77 inflammatory role played by aortic depressor nerve stimulation. However, the  
78 involvement of the baroreceptors afferents in the inflammatory status has not received  
79 the same attention, neither its putative relation with the cardiovascular system.

80           In this study we examined in an integrated matter to the role of baroreceptor  
81 afferents integrity in LPS-induced classical inflammatory cytokines surges [in plasma

82 and spleen – effector organ of the splenic anti-inflammatory reflex (2,20)], hypothermia  
83 and fever, as well as the relation of the inflammatory status with cardiovascular function  
84 in rats.

85

## 86 **Results**

87

### 88 **Cardiovascular and thermoregulatory changes during LPS-induced SI is**

#### 89 **dependent on sino-aortic afferents integrity**

90 First, we investigated whether LPS-induced responses in mean arterial pressure  
91 (MAP) and heart rate (HR) were affected by the surgical removal of the arterial  
92 baroreceptors (SAD). MAP ( $P = 0.5189$ ) and HR ( $P = 0.2197$ ) were similar in Control +  
93 Sal and SAD + Sal animals throughout 180 min (Fig. 1 A). LPS-induced fall in MAP  
94 was significantly higher ( $P < 0.0001$ ) and occurred earlier ( $P = 0.0413$ ) in SAD + LPS  
95 in comparison to Control + LPS rats (Fig. 1 B and D). Furthermore, LPS-induced  
96 tachycardia was blunted in SAD + LPS in comparison to Control + LPS rats (Fig 1 B,  $P$   
97  $< 0.0001$ ). Interestingly, SAD rats presented no fever, but a significant drop in Tb  
98 (hypothermia) in response to LPS (Fig. 1 F and G,  $P = 0.0075$ ). These data indicate that  
99 hemodynamic and thermoregulatory control during LPS-induced SI depends on the  
100 sino-aortic afferents integrity. Successfulness of SAD surgery was confirmed using  
101 pharmacological activation of the baroreflex with phenylephrine (Phe, Fig. 1 C and E,  $P$   
102  $< 0.0001$ ).

#### 103 **Variability in HR and SAP during LPS-induced SI**

104 Variability of pulse interval (PI) in the time domain, determined by the standard  
105 deviation of normal to normal PI (SDNN) and root mean square of successive  
106 differences (RMSSD), was significantly reduced in Control + LPS ( $P < 0.0001$  and  $P =$   
107  $0.0004$ ) and SAD + LPS ( $P < 0.0001$  and  $P = 0.0009$ ) in comparison with Control + Sal

108 (Fig. 2 A and B). Variability of SAP in the time domain [evaluated by standard  
109 deviation (SD) of SAP] was significantly increased in SAD + Sal ( $P = 0.0041$ ), but not  
110 in SAD + LPS ( $P > 0.9999$ ) in comparison with Control + Sal animals (Fig. 2 C).

111 Spectral analysis in the frequency domain of the PI showed that LF power was  
112 not significantly altered between Control + Sal, Control + LPS, SAD + Sal and SAD +  
113 LPS groups (Fig. 3 A and C,  $P > 0.9999$ ). Otherwise, HF power was significantly  
114 reduced in Control + LPS ( $P < 0.0001$ ) and in SAD + LPS rats ( $P < 0.0001$ ) in relation  
115 to Control + Sal group (Fig. 3 B and D). These results indicate that LPS administration  
116 decreases cardiac vagal modulation in Control and SAD rats. Considering the SAP  
117 spectral analysis, a significant increase in the LF component was observed in the  
118 Control + LPS ( $P = 0.0051$ ), but not in SAD + LPS ( $P > 0.9999$ ) in relation to Control +  
119 Sal group, indicating that LPS-induced increase in the sympathetic vasomotor  
120 modulation depends on the baroreceptors afferents integrity (Fig. 3 B and E).

121 The detrended fluctuation analysis (DFA  $\alpha_2$ ) scaling exponent was lower in  
122 Control + LPS than in the Control + Sal group ( $P = 0.0223$ , Fig. 4 B), whereas the same  
123 scaling exponent was significantly increased in SAD + Sal ( $P < 0.0001$ ) and in SAD +  
124 LPS ( $P = 0.0040$ ) in relation to Control + Sal rats (Fig. 4 B). The DFA  $\alpha_3$  scaling  
125 exponent was significantly higher in SAD + Sal ( $P = 0.0133$ ) than in Control + Sal rats  
126 (Fig. 4 C). The multiscale entropy (MSE) curves from all the evaluated groups are  
127 shown in Fig. 5 A and B. The MSE for the SAD + Sal group was significantly reduced  
128 on small time scales in relation to Control + Sal ( $P < 0.0001$ ;  $P = 0.0004$  and  $P =$   
129  $0.0017$ ; Fig. 5 A, C, D and E). On the other hand, in the Control + LPS, the MSE was  
130 significantly increased in comparison with Control + Sal group ( $P = 0.0444$ , Fig. 5 B  
131 and B).

132

### 133 **Vascular reactivity during LPS-induced SI**

134           Considering that LPS induced a significant drop in MAP associated with  
135 autonomic dysfunction, we investigated whether SI leads to vascular damage in  
136 resistance blood vessels and if this eventual vascular dysfunction is exacerbated in rats  
137 submitted to SAD. The contraction of mesenteric resistance arteries stimulated by  
138 potassium chloride (KCl - 120 mM) was significantly reduced in Control + LPS, SAD +  
139 Sal, and SAD + LPS when compared with Control + Sal group ( $P = 0.05$ , Fig. 6 A).  
140 Similarly, maximum contractile responses induced by Phe were reduced in mesenteric  
141 arteries from LPS-treated Control and SAD groups ( $P < 0.05$ , Fig. 6 B). Vascular  
142 hyporesponsiveness to vasoconstrictors was reverted by the incubation with a non-  
143 selective inhibitor of nitric oxide synthase, L-NAME ( $P > 0.05$ , Fig. 6 C). These data  
144 indicate that both SAD and LPS administration *per se* leads to vascular dysfunction, but  
145 without additive effects.

146           Furthermore, endothelium-dependent vascular relaxation induced by cumulative  
147 concentrations of acetylcholine (ACh) was similar among the groups (Fig. 6 D). In  
148 contrast, endothelium-independent vasodilation to sodium nitroprusside (SNP) was  
149 reduced in mesenteric arteries from Control + LPS, SAD + Sal, SAD + LPS groups in  
150 comparison with the Control + Sal group ( $P < 0.05$ , Fig. 6 E). In addition, maximum  
151 contractile responses induced by electrical-field stimulation (EFS) were significantly  
152 decreased in arteries from Control + LPS, SAD + Sal and SAD + LPS rats ( $P < 0.05$ ,  
153 Fig. 7 A). L-NAME reversed decreased EFS-induced contractions only in arteries from  
154 the Control + LPS group ( $P < 0.05$ , Fig. 7 B).

### 155 **Cytokine levels in plasma and spleen during LPS-induced SI**

156           Considering our previous study that documented hemodynamic and  
157 inflammatory changes 3 hours following LPS administration (18), cytokine levels were

158 evaluated at this same period in plasma and spleen as an index of SI and the modulatory  
159 role of sino-aortic afferents on the splenic anti-inflammatory reflex, respectively.

#### 160 *Plasma*

161 LPS increased the plasmatic levels of the pro-inflammatory cytokines TNF- $\alpha$  (P  
162 = 0.0030), IL-6 (P < 0.0001), and IFN- $\gamma$  (P = 0.0086) and the anti-inflammatory  
163 cytokine IL-10 (P = 0.0002) in Control + LPS in comparison with Control + Sal rats.  
164 Interestingly, SAD decreased LPS-induced IL-6 (P = 0.0049) and IL-10 plasma levels  
165 (P = 0.05, Fig. 8 A, B, C and D). These results indicate that baroreflex positively  
166 modulates LPS-induced peripheral cytokine surges.

#### 167 *Spleen*

168 Spleen is considered the efferent component of the “splenic anti-  
169 inflammatory reflex” (20). In the spleen, we observed a significant increase in TNF- $\alpha$  (P  
170 = 0.0242), IL-6 (P = 0.0026), IL-10 (P < 0.0001), and IFN- $\gamma$  (P = 0.05) in Control +  
171 LPS in comparison with Control + Sal rats. In addition, we observed reduced surges of  
172 TNF- $\alpha$  (P = 0.7554) or IFN- $\gamma$  levels (P > 0.9999) in SAD + LPS group in relation to  
173 Control + LPS animals (Fig. 8 E, F, G and H). These findings indicate that SAD reduces  
174 inflammatory signaling in spleen during SI.

#### 175 **Corticosterone, NOx, and norepinephrine during LPS-induced SI**

176 Plasma corticosterone levels were increased in Control + LPS (P < 0.0001) and  
177 in SAD + LPS (P < 0.0001) in comparison with Control + Sal group. There was no  
178 significant difference between Control + LPS and SAD + LPS groups (P > 0.9999, Fig.  
179 9 A). Interestingly, the observed LPS-induced drop in MAP was accompanied by  
180 increased plasma nitrate concentration, and these changes were independent of  
181 baroreceptor afferents integrity (P < 0.0001, Fig. 9 B). Furthermore, plasma  
182 norepinephrine levels were similar in all the evaluated groups (Fig. 9 C, P = 0.7053).

183 **Discussion**

184

185 The present study is the first to report that baroreceptors afferents are key to  
186 modulate not only LPS-induced SI but also its consequent cardiovascular changes and  
187 to provide evidence that these phenomena are not dependent of each other. Supporting  
188 this notion, we observed that the LPS-induced hypotension was higher and earlier in  
189 rats previously submitted to SAD than in control rats. We also show that HF power of  
190 PI was altered in rats that received LPS, while LPS-induced increase in LF component  
191 of SAP was dependent on sino-aortic afferents integrity, even in the presence of  
192 vascular dysfunction. Of particular importance, we observed reduced surges of plasma  
193 interleukin (IL)-6 and IL-10 and splenic TNF- $\alpha$  and interferon- $\gamma$  in SAD rats, indicating  
194 that SAD not only modulated LPS-induced cardiovascular collapse but also reduced  
195 peripheral cytokines surges. Moreover, this reduced LPS-induced plasma cytokines  
196 surges seems to be at least in part mediated by the splenic anti-inflammatory reflex (20),  
197 since reduced levels of pro-inflammatory cytokines in the spleen were observed after  
198 SAD (Fig. 8).

199 **Cardiovascular control during SI is dependent on baroreceptor afferents integrity**

200 Considering that baroreceptor afferents integrity is important in the moment-to-  
201 moment control of cardiovascular function (21), we recorded blood pressure and HR in  
202 conscious rats through 3 hours after LPS administration. LPS-induced hypotension was  
203 significantly enhanced after SAD (Fig. 1). In contrast, LPS-induced tachycardia was  
204 blunted in SAD rats. Tachycardia during SI is a compensatory mechanism regulating  
205 hypotension (17) which is associated with vascular dysfunction (22). Blunted  
206 tachycardia with greater hypotension in SAD rats may be related, at least in part, to a  
207 baroreflex-dependent cardiovascular regulation during SI. Several studies document that  
208 baroreflex modulates sympathetic and parasympathetic activity to the heart and



209 resistance blood vessels in health and disease, including SI (11,23,24). Our results are  
210 consistent with the notion that the LPS-induced hypotension (Fig. 1), caused by a  
211 reduction in vascular resistance (Fig. 6 and 7) even in the presence of increase of  
212 sympathetic vasomotor tone (Fig. 3), is critically dependent upon the baroreceptors  
213 afferents integrity in conscious rats. These data are in agreement with prior studies  
214 showing a significant fall in blood pressure of anesthetized rats that received a lethal  
215 dose of LPS (15 mg.kg<sup>-1</sup>, given IP) and in which carotid chemo and baroreceptors were  
216 previously denervated (25). Moreover, it has been reported that SAD rats show a  
217 significant reduction in the survival time during polymicrobial sepsis, indicating that  
218 baroreflex dysfunction is associated with a poor sepsis prognosis (26). Of special  
219 significance, LPS-induced tachycardia was significantly blunted in SAD + LPS rats,  
220 indicating that in our experimental condition, baroreflex integrity is involved, at least in  
221 part, with increased HR during SI.

222         Regarding HR variability in the time-domain, LPS-induced SI acutely reduced  
223 SDNN and in RMSSD, which were not affected by SAD (Fig. 2). These findings are  
224 consistent with the notion that during SI, an imbalance in the autonomic cardiac control  
225 takes place. Previous studies indicate that both LPS or TNF- $\alpha$  administration  
226 significantly reduces HR variability in mice indicating a causal link between cytokines  
227 and abnormal SDNN (27). More recently, clinical studies point out that HR variability  
228 is significantly increased in athletes and reduced in patients (28). In respect of SAP  
229 variability, the SD of MAP was only sustained in SAD + Sal group, suggesting that the  
230 hallmark of SAD experimental model, [higher variability of the MAP (13)] is critically  
231 affected during SI.

232         In the search for mechanisms underlying hemodynamic control during SI, we  
233 used spectral analysis of PI in the frequency domain, which showed that HF component

234 of PI was significantly reduced at 3 hours after endotoxin in Control + LPS and in SAD  
235 + LPS in relation to Control + Sal (Fig 3 A and D). These observations are in line with  
236 the concept that LPS-induced tachycardia is triggered by mechanisms resulting in a  
237 decrease of vagal modulation to the heart (18). Significant changes in the autonomic  
238 control to the heart have been observed during the initial phase of sepsis-associated SI  
239 as a compensatory adjustment to avoid circulatory shock (29). Regarding the variance  
240 of SAP in the frequency domain, the LF component was significantly increased in  
241 Control + LPS rats than in Control + Sal and SAD + LPS (Fig. 3), indicating that LPS-  
242 induced increases in sympathetic vasomotor tone depends on sino-aortic afferents  
243 integrity even in the presence of vascular dysfunction. This eventual sustained  
244 sympatho-excitation during SI is in agreement with a previous study (17) and suggest  
245 that sympathetic drive to resistance vessels does not revert hypotension in this  
246 experimental model.

247 In addition to linear methods (time and frequency-domain analyses), non-linear  
248 approaches were also used in the present study. Methods for analysis of nonlinear  
249 dynamics has been utilized to increase the interpretation of the complexity  
250 cardiovascular function (30,31). We found that DFA  $\alpha_2$  scaling exponent of SAP was  
251 reduced in Control + LPS rats and was greater in SAD + Sal and in SAD + LPS than in  
252 Control + Sal rats (Fig. 4). These findings are consistent with the notion that the control  
253 of blood pressure is highly complex and that during LPS-induced SI the oscillations in  
254 SAP tend to erratic or random patterns ( $\alpha_2 < 1$ ). In contrast, when LPS is  
255 administrated to SAD animals, SAP oscillations tend to be smoother ( $\alpha_2 > 1$ ).  
256 Reconciling the data obtained from MSE curves, we observed that SAP entropy of the  
257 SAD + Sal and Control + LPS was significantly different from those for Control + Sal  
258 group (Fig. 5), suggesting the that the baroreflex plays an important role in the complex

259 response to challenges imposed to the cardiovascular system (30). Although a direct  
260 interpretation of the functional meaning of these results is not an easy task, the analyses  
261 of SAP complexity has been used to predict cardiovascular outcomes and has been  
262 associated with high mortality risks (32). As far as we know, this is the first study that  
263 analyzed these cardiovascular complexity patterns by nonlinear approaches in SAD rats  
264 during SI. Whether or not SAD-induced changes in cardiovascular complexity may  
265 worse hemodynamic collapse during SI is an interesting matter deserving further  
266 investigation.

### 267 **Vascular dysfunction during SI or SAD are not cumulative**

268         Considering previous studies (17,18,33) and our own data (Fig. 1) documenting  
269 cardiovascular collapse during SI, we further evaluated the vascular function after LPS  
270 administration in Control and SAD animals in mesenteric resistance arteries. After LPS  
271 administration, a significant reduction in contraction induced by Phe and by EFS in  
272 mesenteric arteries from LPS-treated Control and SAD groups occurs (Fig. 6 and 7).  
273 Vascular hyporesponsiveness was reverted by the nitric oxide synthase inhibitor L-  
274 NAME, indicating that LPS-induced SI reduces contraction of resistance arteries by  
275 mechanisms that involve nitric oxide synthase activation whereas may be independent  
276 of baroreceptors afferents integrity. It is important to point out that LF component of  
277 SAP (an index of sympathetic vasomotor tone) was observed to be increased in Control  
278 + LPS conscious rats and that vascular responsiveness to Phe was observed to be  
279 decreased in mesenteric resistance arteries of these animals in comparison with Control  
280 + Sal suggesting that in SI changes in the sympathetic nerves modulation to alpha1-  
281 adrenergic receptors in mesenteric resistance arteries take place.

282         Additionally, the endothelium-dependent relaxation response induced by  
283 cumulative concentrations of ACh was similar between the all Control and SAD groups

284 groups (Fig. 6), indicating that neither SAD itself nor LPS administration cause  
285 endothelium dysfunction in our experimental condition. Conversely, endothelium-  
286 independent relaxation response was reduced in mesenteric arteries from all the groups  
287 that received LPS, probably due to changes in the sensitivity to guanylate cyclase/  
288 cGMP pathway (34). The hypothesis that the guanylate cyclase/cGMP pathway is  
289 affected during SI is possible given that NO-induced activation of guanylate cyclase  
290 enzyme in vascular smooth muscle cells leads to recruitment of intracellular signaling  
291 cascades that reduce intracellular  $Ca^{2+}$  levels, open  $K^+$  channels and cause relaxation  
292 (35).

### 293 **Changes in Tb during SI are affected by SAD**

294 Interestingly, rats submitted to SAD presented no fever, but a significant fall in  
295 Tb (hypothermia) after LPS administration (Fig. 1). The mechanisms involved in LPS-  
296 induced hypothermia are not completely known. Nevertheless, SI-associated  
297 hypothermia has considerable clinical implications (36). One may consider LPS-  
298 induced hypothermia as a failure in neural control of Tb. Alternatively, recent studies  
299 have suggested that hypothermia is precisely controlled by specific mechanisms  
300 mediated by the central nervous system (37). Based on these data, we suggest that  
301 baroreceptor afferents integrity affect thermoregulatory control during SI by impairing a  
302 key part of the afferent signals to the brain. We further speculate that among the  
303 important multimodal functions of arterial baroreceptors (21) febrigenic signaling in the  
304 periphery affects brain circuitry at least in part by interacting with peripheral  
305 baroreceptors afferents. The reduced LPS-induced plasma surges of IL-6 in SAD rats  
306 (Fig. 8) may be at least one of the contributing factors in thermogenesis during SI, since  
307 this cytokine is known to induces increases in Tb acting as an important endogenous  
308 pyrogen (38). These baroreceptor afferents effects on thermoregulation must take place

309 through thermoeffectors modulation, but it remains unknown if this modulation is via  
310 sympathetic innervation of the brown adipose tissue (affecting non-shivering  
311 thermogenesis) or sympathetic innervation of the tail artery (affecting heat loss index).  
312 **Plasma and spleen surges of pro-inflammatory cytokines during SI are affected by**  
313 **SAD**

314 The LPS-induced plasma surges of IL-6 (a pro-inflammatory cytokine) and IL-  
315 10 (an anti-inflammatory cytokine) in SAD rats were significantly reduced after SAD  
316 (Fig. 6). These findings indicate that baroreflex does modulate the LPS-induced  
317 peripheral cytokine surges and adds new information to a previous study that  
318 documented that electrical baroreflex stimulation inhibits LPS-induced pro-  
319 inflammatory cytokines surges not in the periphery but in the brain (19). A putative  
320 mechanism by which sino-aortic afferents may play a modulatory effect in the LPS-  
321 induced IL-6 and IL-10 plasma surges may be related to macrophages polarization, a  
322 highly heterogeneous cell population, during SI. Activated macrophages M1 exhibit  
323 high levels of pro-inflammatory cytokines, while activated M2 macrophages exhibit  
324 high levels of anti-inflammatory cytokines (39).

325 In addition to circulating macrophages aforementioned, the main efferent target  
326 organ for the splenic anti-inflammatory reflex is the splenic macrophages located in the  
327 white pulp (2). We showed here that spleen tissue homogenates collected from rats that  
328 received LPS exhibit a significant increase of pro-inflammatory cytokines. Surprisingly,  
329 there were no significant increases in TNF- $\alpha$  [an essential early mediator of  
330 inflammation (2,40)] or IFN- $\gamma$  [a later inflammatory marker (41)] levels in rats  
331 submitted to SAD during LPS-induced SI (Fig. 8 B). Combining a previous study  
332 showing that stimulation of the efferent fibers impinges upon the spleen leads to a  
333 significant anti-inflammatory effects in this organ during LPS-induced SI (42) and our

334 own data in which SAD rats showed decreased LPS-induced surges of pro-  
335 inflammatory cytokines in the spleen, we suggest that the efferent arm of the splenic  
336 anti-inflammatory reflex is modulated by baroreceptors afferents.

337         Considering that baroreflex stimulation downregulates pro-inflammatory  
338 cytokines in hypothalamus, but not in plasma, heart and spleen (19) we hypothesized  
339 that SAD worsens cytokines surges in plasma. Contrary to our expectations, after SAD,  
340 LPS-induced surges of cytokines were blunted in plasma and spleen (Fig 8.) suggesting  
341 that the baroreceptor afferents integrity/stimulation may differentially affect peripheral  
342 and central pro-inflammatory cytokines surges in this critical condition that resembles  
343 some features of sepsis, a considerable healthcare burden.

344         A plethora of studies have provided strong evidence demonstrating autonomic  
345 regulation of immune function (2,43). For instance an inhibitory action of the  
346 sympathetic nervous system and its main neurotransmitter, norepinephrine on SI has  
347 been documented (2,43). In the present study, we show that the known LPS-induced  
348 enhancement of sympathetic vasomotor tone (23, 43) may be attributable, at least in  
349 part, to sino-aortic afferents integrity (Fig. 3). Whether the LPS-induced sustained  
350 increase in the activity of the splenic nerves (2) is affected by sino-aortic afferents is a  
351 possibility that requires additional investigation. In addition, if pro-inflammatory  
352 cytokines surges in SI (2) are regulated by baroreceptor afferents or if this exacerbate  
353 release of immune mediators represents a failure of the adaptive mechanisms are  
354 interesting matters to be explored.

355         Even though we observed that SAD affects LPS-induced cardiovascular  
356 collapse, thermoregulation and inflammatory signaling, we can make no conclusions  
357 about the causal link between these important regulatory functions, reflecting the  
358 complexity of this experimental model in which a myriad of events lead to multiple

359 organ failure and eventually death depending on the doses of LPS. We suggest that the  
360 baroreflex-dependent mechanisms mediating inflammatory status are not associated  
361 with cardiovascular collapse, given that SAD reduced cytokines surges (both in plasma  
362 and spleen) and exacerbate hypotension.

363 **Corticosterone, NOx and norepinephrine during SI are not affected by SAD**

364 In SI, a significant increase in plasma corticosterone (a hormone with anti-  
365 inflammatory action) levels occurs. This LPS-induced increased corticosterone levels  
366 were not affected in SAD rats (Fig. 9 A). These data support the notion that during LPS-  
367 induced SI an increase in the hypothalamic-pituitary-adrenal axis activity occurs (44)  
368 and that this activation is independent of the baroreceptor afferents integrity.

369 To provide insights into the mechanisms involved in hypotension during SI, we  
370 also assessed plasma NO (a potent vasodilator) and norepinephrine (a vasopressor  
371 neurotransmitter) levels (Figs 9). Taking into consideration that during sepsis, NO  
372 pathway system is markedly stimulated leading to decreased vascular responsiveness to  
373 constrictor stimuli (22), our findings further support the notion that indeed LPS-induced  
374 SI is accompanied by a significant increase in plasma NO production, that does not  
375 depend on baroreceptors integrity. Moreover, these findings indicate that greater  
376 hypotension in SAD rats is not associated with higher NO production, but rather to the  
377 autonomic imbalance *per se* (Fig. 9 B). Similarly, the observed effects of SAD on the  
378 LPS-induced hemodynamic dysfunction seems to be independent of systemic  
379 noradrenaline levels, since this catecholamine levels were similar among groups (Fig. 9  
380 C). However, these data do not rule out that local noradrenaline release from  
381 sympathetic nerve terminals during SI may be different depending on the vascular bed.

382 In conclusion, the present data are consistent with the notion that the role of  
383 baroreflex afferents on LPS-induced SI goes beyond the lessening hypotension and

384 tachycardia despite severe vascular dysfunction and affecting inflammatory status. The  
385 present findings shed light on the mechanisms underlying the contribution of  
386 cardiovascular afferents in the regulation of the inflammatory surges in plasma and  
387 spleen during SI.

388

## 389 **Materials and Methods**

390 All animal experimentation was executed according to directions for animal  
391 study from the National Council for Animal Experimentation Control in Brazil  
392 (CONCEA). The experimental procedures were also reviewed and approved by The  
393 Ethics Committee on Animal Research of the Dental School of Ribeirão Preto -  
394 University of São Paulo, Ribeirão Preto, Brazil (#2017.1.585.58.9).

## 395 **Animals**

396 Male Wistar rats (300–350 g) were acquired from the Animal Care Facility of  
397 the University of São Paulo at Ribeirão Preto. During experiments they were kept in  
398 plastic cages in the animal facility of the Dental School of Ribeirão Preto, University of  
399 São Paulo under a 12-h light/dark cycle (lights on at 6 am) at 23-24 °C. Rats had  
400 unrestricted access to standard chow and tap water.

## 401 **Surgical procedures**

### 402 *Sino-aortic denervation*

403 The most well accepted model of baroreceptor afferents removal, called sino-  
404 aortic denervation (SAD) (45,23,46), was performed aseptically using a standard  
405 technique (47). Briefly, rats were anesthetized with a cocktail of ketamine (100 mg.kg<sup>-1</sup>)  
406 and xylazine (10 mg.kg<sup>-1</sup>) and fixed in the supine position after the absence of the  
407 withdrawal reflex to tail and paw pinch. Additional doses of anesthetic were  
408 administered if necessary. A ventral midcervical incision was performed and fibers



409 from the aortic depressor nerve traveling with the superior laryngeal nerve and superior  
410 cervical ganglion were transected. The carotid baroreceptors were denervated by  
411 removal of surrounding tissues from the carotid sinus.

#### 412 *Arterial and venous catheterization*

413 On the fourth day after SAD rats were anaesthetized with ketamine and xylazine  
414 and a polyethylene catheter (PE-10 connected to PE-50 tubing; Clay Adams,  
415 Parsippany, NJ, USA, Intramedic, Becton Dickinson, Sparks, MD, EUA), was placed  
416 into the abdominal aorta by means of femoral artery. Femoral vein was also  
417 catheterized. Artery catheterization was used to direct hemodynamic recordings while  
418 vein catheter was utilized for drug administration. Both catheters were tunneled  
419 subcutaneously and exteriorized through the skin in the nape of the neck, and the  
420 surgical wounds were sutured aseptically. Rats recovered individually in the recording  
421 room. On the following day the arterial catheter was connected to a pressure transducer  
422 (MLT0380; ADInstruments), and in turn, to an amplifier (Bridge Amp, ML221;  
423 ADInstruments). Pulsatile arterial pressure (PAP) and heart rate (HR) were recorded  
424 using the Chart Pro software (ADInstruments) were recorded simultaneously placed in  
425 side-by-side cages. Rats from different groups were recorded simultaneously placed in  
426 side-by-side cages. Beat-by-beat series of systolic arterial pressure (SAP) and PI were  
427 obtained from the raw PAP recordings and SAP or PI variability was evaluated using  
428 the software CardioSeries (48) and JBioS (49).

429 In the time domain, standard deviation (SDNN) and root mean square of the  
430 successive differences (RMSSD) were calculated from PI series. Standard deviation  
431 (SD) was also obtained from SAP series. In the frequency domain, the power spectra of  
432 PI and SAP were estimated by the modified periodogram and Welch protocol (50).  
433 Briefly, all series were interpolated at 10 Hz (cubic spline) and divided into segments of

434 512 points (51.2 seconds). Segments containing artifacts or transients were excluded.  
435 Next, each selected segment was multiplied by a Hanning window and the periodogram  
436 was estimated. The PI spectra were integrated into low- (LF, 0.2–0.75 Hz) and high-  
437 frequency (HF, 0.75–3 Hz) bands, while the SAP spectra were integrated at LF band  
438 only. The power at LF band was assessed in normalized units (nu), represented by  
439  $LF/(LF+HF)$ , whereas the power at HF band was evaluated in absolute units. According  
440 to previous studies (31,51), this representation provides the best correlation of spectral  
441 indices to the sympathetic and parasympathetic modulation of the heart rate,  
442 respectively.

443 Nonlinear properties of PI and SAP series were assessed by multiscale entropy  
444 (MSE) and detrended fluctuation analysis (DFA) (52,53). MSE quantifies the degree of  
445 irregularity (unpredictability) of time series over increasing time scales and can be  
446 considered a measure of physiological complexity. Healthy systems represent the most  
447 complex physiological status, whereas aging and diseases denote some disruption in the  
448 integrative regulatory mechanisms, decreasing the capability of the organism to adapt to  
449 changing demands (54). MSE parameters were set to  $m=2$  (embedding dimension),  
450  $r=15\%$  of time series SD (tolerance factor) and  $\tau=1\dots 20$  (time scales). On the other  
451 hand, DFA quantifies the power law scaling of time series, which is related to its fractal  
452 temporal structure (55). In the present study,  $\alpha_1$  comprises windows from 5 to 15  
453 points and  $\alpha_2$  comprises windows from 30 to 10 and  $\alpha_3$  comprises windows from 100  
454 to  $N/10$  points, where  $N$  is the time series length.

#### 455 *Temperature datalogger implantation*

456 In the same surgical procedure for arterial and venous catheterization, a median  
457 laparotomy was done and an intraperitoneal temperature data-logger capsule (SubCue,

458 Calgary, AB, Canada) was inserted to deep body (Tb) temperature recordings in rats.

459 Afterward, surgical wounds were sutured aseptically.

#### 460 **Vascular reactivity studies**

461 The method described by Mulvany and Halpern (1977) (56) was used. Animals  
462 were euthanized and segments of third-branch mesenteric arteries, measuring about 2  
463 mm in length, were mounted in a small vessel myograph (Danish Myo Tech, Model  
464 620M, A/S, Århus, Denmark). Arteries were maintained in a Krebs Henseleit solution  
465 [(in mM) NaCl 130, KCl 4.7, KH<sub>2</sub>PO<sub>4</sub> 1.18, MgSO<sub>4</sub> 1.17, NaHCO<sub>3</sub> 14.9, Glucose 5.5,  
466 EDTA 0.03, CaCl<sub>2</sub> 1.6], at a constant temperature of 37 °C, pH 7.4, and gassed with a  
467 mixture of 95% O<sub>2</sub> and 5% CO<sub>2</sub>.

468 Mesenteric resistance arteries were set to reach a tension of 13.3 kPa (kilopascal)  
469 and remained at rest for 30 min for stabilization. The arteries were stimulated with  
470 Krebs solution containing a high concentration of potassium [K<sup>+</sup>, (120 mM)] to evaluate  
471 the contractile capacity of the segments. After washing and return to the basal tension,  
472 arteries were contracted with Phe (10<sup>-6</sup> M) and then stimulated with ACh (10<sup>-5</sup> M) to  
473 determine the presence of a functional endothelium. Arteries exhibiting a vasodilator  
474 response to ACh greater than 80% were considered endothelium-intact vessels. After  
475 washing and another period of stabilization, concentration-response curves to Phe (10<sup>-10</sup>  
476 to 3x10<sup>-5</sup>) and EFS were performed in mesenteric resistance arteries to produce  
477 contractions, measured as increases in baseline tension. EFS was applied to arteries  
478 placed between platinum pin electrodes and conducted at 20 V, 1-ms pulse width, and  
479 trains of stimuli lasting 10 s at varying frequencies (1 to 32 Hz).

480 Vasodilation responses were determined in mesenteric resistance arteries  
481 contracted with Phe (10<sup>-6</sup> to 3x10<sup>-6</sup> M). After 15 min, concentration-response curves to  
482 ACh (10<sup>-10</sup> to 3x10<sup>-5</sup> M) and SNP (10<sup>-10</sup> to 10<sup>-5</sup> M) were carried out. Concentration-

483 response curves to Phe, EFS and ACh were also performed in the presence of L-NAME  
484 ( $10^{-4}$  M).

#### 485 **Plasma measurements**

486 At the end of the cardiovascular and Tb recordings, arterial blood was  
487 withdrawn in EDTA-coated tubes and centrifuged (20 min at 3.500 rpm, 4 °C), for  
488 plasma extraction, on the third hour after saline or LPS administration. All plasma  
489 samples were kept at  $-80$  °C until assays.

#### 490 *Cytokines and noradrenaline*

491 Plasma samples were assayed for measurement of tumor necrosis factor (TNF)-  
492  $\alpha$ , interleukin (IL)-6, IL-10 and interferon (IFN)- $\gamma$  using multiplex assay kits according  
493 to standard instructions (LXSARM - 05, R&D System, Minnesota, USA) with  
494 Luminex® Magpix™ technology (Austin, TX, USA). Plasma samples were assayed for  
495 measurement of noradrenaline (Cloud-Clone, Texas – USA) levels, using enzyme-  
496 linked immunosorbent assay (ELISA) kits according to standard instructions.

497 Spleens were homogenized in 0.5 mL of PBS, protease inhibitor cocktail (Cell  
498 Signaling, Massachusetts, USA) and then centrifuged at 13,000 rpm for 20 min at 4 °C.  
499 Tissue supernatant samples were used to measure TNF- $\alpha$ , IL-6, IL-10, and IFN- $\gamma$  levels  
500 by a multiplex assay as in plasma samples. Data from splenic cytokines were  
501 normalized by protein concentrations by means of Bradford assay (#5000205, Bio-Rad  
502 Laboratories, USA).

#### 503 *Radioimmunoassay for corticosterone*

504 Plasmatic corticosterone extractions and radioimmunoassay were performed  
505 from 25  $\mu$ L of plasma by adding 1 mL of ethanol according to Haack et al., (1979) (57).

#### 506 *Nitric oxide (nitrate, NOx)*

507 Plasma NOx levels were assessed by using the chemiluminescence NO-Ozone

508 technique. Nitrate concentrations were measured using 40  $\mu$ L aliquots of the plasma  
509 samples inserted into a NO analyzer (model 280, Sievers Instruments, Boulder, CO,  
510 USA).

511 **Experimental Design:**

512 Rats were assigned into 4 experimental groups:

513 Control + Sal: Naïve rats that received saline administration.

514 Control + LPS: Naïve rats that received LPS administration.

515 SAD + Sal: SAD rats that received saline administration.

516 SAD + LPS: SAD rats that received LPS administration.

517 **1) Protocol #1:** To study the role of sino-aortic afferents integrity in LPS-induced  
518 changes in MAP, HR and Tb, rats were catheterized and had a datalogger implant and  
519 on the day after they received an iv injection of saline or LPS and were recorded up to  
520 180 min after iv administration. To avoid the influence of variability of MAP of SAD  
521 rats in the results, the reported values of MAP and HR were obtained as the delta of  
522 baseline values (using a mean of 10 min of recording before the intravenous injection)  
523 and the minimum value for MAP and the maximum value for HR obtained from the last  
524 minute of every 10 min period throughout 180 min. This analysis was done in all the  
525 experimental groups.

526 **2) Protocol #2:** To further characterize the role of sino-aortic afferents integrity in LPS-  
527 induced cardiovascular collapse, spectral analysis of PI and SAP in the time and in the  
528 frequency domain, and analyze of the complexity of cardiovascular function were  
529 evaluated offline.

530 **3) Protocol #3:** 180 min after LPS or saline administration, arterial plasma was  
531 withdrawn to assess corticosterone, NOx, and norepinephrine levels. Cytokines levels  
532 were also assessed in plasma and spleen.

533 **4) Protocol #4:** 180 min after LPS or saline administration, rats were euthanized and  
534 vascular reactivity was evaluated in mesenteric resistance arteries.

#### 535 **Statistical analysis**

536 Data are expressed as mean  $\pm$  S.E.M. (standard error of the mean) and  
537 significant differences were considered at  $P \leq 0.05$ , but exact P values are described.  
538 Unpaired t test, one-, two-way ANOVA followed by the Bonferroni multiple  
539 comparisons test or Kruskal-Wallis test followed by Dunn's multiple comparisons test  
540 were performed when necessary.

541

542 **Conflict of interest:** The authors declare no conflict of interest.

543 **Acknowledgments:** We are grateful to Maria Valci dos Santos and Mauro F. Silva for  
544 their excellent technical assistance.

545 **Funding:** This work was supported by Grant L.G.S.B [#2016/17681-9, São Paulo  
546 Research Foundation (FAPESP)], fellowship to M.R.A. [#2017/09878-0 São Paulo  
547 Research Foundation (FAPESP)] and National Council for Scientific and Technological  
548 Development (CNPq), Brazil.

549

#### 550 **References**

551

- 552 1. Fleischmann C, Scherag A, Adhikari NKJ, Hartog CS, Tsaganos T, Schlattmann P,  
553 et al. Assessment of Global Incidence and Mortality of Hospital-treated Sepsis.  
554 Current Estimates and Limitations. *Am J Respir Crit Care Med.* 2016; 193:259–72.
- 555 2. Martelli D, Yao ST, McKinley MJ, McAllen RM. Reflex control of inflammation  
556 by sympathetic nerves, not the vagus. *J Physiol.* 2014; 592:1677–86.
- 557 3. Komegae EN, Farmer DGS, Brooks VL, McKinley MJ, McAllen RM, Martelli D.  
558 Vagal afferent activation suppresses systemic inflammation via the splanchnic  
559 anti-inflammatory pathway. *Brain Behav Immun.* 2018; 73:441-449.
- 560 4. Lalu MM, Sullivan KJ, Mei SH, Moher D, Straus A, Fergusson DA, et al.  
561 Evaluating mesenchymal stem cell therapy for sepsis with preclinical meta-  
562 analyses prior to initiating a first-in-human trial. *eLife.* 2016; 5.
- 563 5. Cohen J. The immunopathogenesis of sepsis. *Nature.* 2002; 420:885–91.
- 564 6. Nathan C. Points of control in inflammation. *Nature.* 2002; 420:846–52.

- 565 7. Saia RS, Bertozi G, Mestriner FL, Antunes-Rodrigues J, Queiróz Cunha F, Cárnio  
566 EC. Cardiovascular and inflammatory response to cholecystokinin during  
567 endotoxemic shock. *Shock*. 2013; 39:104–13.
- 568 8. Fernandez R, Nardocci G, Navarro C, Reyes EP, Acuña-Castillo C, Cortes PP.  
569 Neural reflex regulation of systemic inflammation: potential new targets for sepsis  
570 therapy. *Front Physiol*. 2014; 5:489.
- 571 9. Zhou H, Bulek K, Li X, Herjan T, Yu M, Qian W, et al. IRAK2 directs stimulus-  
572 dependent nuclear export of inflammatory mRNAs. *eLife*. 2017; 6.
- 573 10. Singer M, Deutschman CS, Seymour CW, Shankar-Hari M, Annane D, Bauer M,  
574 et al. The Third International Consensus Definitions for Sepsis and Septic Shock  
575 (Sepsis-3). *JAMA*. 2016; 315:801–10.
- 576 11. Dampney R a. L, Coleman MJ, Fontes M a. P, Hirooka Y, Horiuchi J, Li YW, et  
577 al. Central mechanisms underlying short- and long-term regulation of the  
578 cardiovascular system. *Clin Exp Pharmacol Physiol*. 2002; 29:261–8.
- 579 12. Fernandez G, Lee JA, Liu LC, Gassler JP. The Baroreflex in Hypertension. *Curr*  
580 *Hypertens Rep*. 2015; 17:19.
- 581 13. Jacob HJ, Barres CP, Machado BH, Brody MJ. Studies on neural and humoral  
582 contributions to arterial pressure lability. *Am J Med Sci*. 1988; 295:341–5.
- 583 14. Amorim MR, Souza GM, Machado BH. Possible Breathing Influences on the  
584 Control of Arterial Pressure After Sino-aortic Denervation in Rats. *Curr Hypertens*  
585 *Rep*. 2018; 20:2.
- 586 15. Rogausch H, Vo NT, Del Rey A, Besedovsky HO. Increased sensitivity of the  
587 baroreceptor reflex after bacterial endotoxin. *Ann N Y Acad Sci*. 2000; 917:165–8.
- 588 16. Shen F-M, Guan Y-F, Xie H-H, Su D-F. Arterial baroreflex function determines  
589 the survival time in lipopolysaccharide-induced shock in rats. *Shock*. 2004;  
590 21:556–60.
- 591 17. Vayssettes-Courchay C, Bouysset F, Verbeuren TJ. Sympathetic activation and  
592 tachycardia in lipopolysaccharide treated rats are temporally correlated and  
593 unrelated to the baroreflex. *Auton Neurosci Basic Clin*. 2005; 120:35–45.
- 594 18. Amorim MR, de Deus JL, Cazuza RA, Mota CMD, da Silva LEV, Borges GS, et  
595 al. Neuroinflammation in the NTS is associated with changes in cardiovascular  
596 reflexes during systemic inflammation. *J Neuroinflammation*. 2019; 16:125.
- 597 19. Brognara F, Castania JA, Dias DPM, Lopes AH, Fazan R, Kanashiro A, et al.  
598 Baroreflex stimulation attenuates central but not peripheral inflammation in  
599 conscious endotoxemic rats. *Brain Res*. 2018; 1682:54–60.
- 600 20. Tracey KJ. The inflammatory reflex. *Nature*. 2002; 420:853–9.
- 601 21. Cowley AW, Liard JF, Guyton AC. Role of baroreceptor reflex in daily control of  
602 arterial blood pressure and other variables in dogs. *Circ Res*. 1973; 32:564–76.



- 603 22. Miranda M, Balarini M, Caixeta D, Bouskela E. Microcirculatory dysfunction in  
604 sepsis: pathophysiology, clinical monitoring, and potential therapies. *Am J*  
605 *Physiol-Heart Circ Physiol*. 2016; 311:H24–35.
- 606 23. Amorim MR, Bonagamba LGH, Souza GMPR, Moraes DJA, Machado BH.  
607 Changes in the inspiratory pattern contribute to modulate the sympathetic activity  
608 in sino-aortic denervated rats. *Exp Physiol*. 2017; 102:1100–17.
- 609 24. Guyenet PG. The sympathetic control of blood pressure. *Nat Rev Neurosci*. 2006;  
610 7:335–46.
- 611 25. Nardocci G, Martin A, Abarzúa S, Rodríguez J, Simon F, Reyes EP, et al. Sepsis  
612 progression to multiple organ dysfunction in carotid chemo/baro-denervated rats  
613 treated with lipopolysaccharide. *J Neuroimmunol*. 2015; 278:44–52.
- 614 26. Shi K-Y, Shen F-M, Liu A-J, Chu Z-X, Cao Y-L, Su D-F. The survival time post-  
615 cecal ligation and puncture in sinoaortic denervated rats. *J Cardiovasc Pharmacol*.  
616 2007; 50:162–7.
- 617 27. Fairchild KD, Saucerman JJ, Raynor LL, Sivak JA, Xiao Y, Lake DE, et al.  
618 Endotoxin depresses heart rate variability in mice: cytokine and steroid effects.  
619 *Am J Physiol - Regul Integr Comp Physiol*. 2009; 297:R1019–27.
- 620 28. Shaffer F, Ginsberg JP. An Overview of Heart Rate Variability Metrics and  
621 Norms. *Front Public Health*. 2017; 5.
- 622 29. DellaVolpe JD, Moore JE, Pinsky MR. Arterial blood pressure and heart rate  
623 regulation in shock state: *Curr Opin Crit Care*. 2015; 21:376–80.
- 624 30. Silva LEV, Rodrigues FL, Oliveira M de, Salgado HC, Fazan R. Heart rate  
625 complexity in sinoaortic-denervated mice. *Exp Physiol*. 2015; 100:156–63.
- 626 31. Silva LEV, Geraldini VR, de Oliveira BP, Silva CAA, Porta A, Fazan R.  
627 Comparison between spectral analysis and symbolic dynamics for heart rate  
628 variability analysis in the rat. *Sci Rep*. 2017; 7.
- 629 32. Esen F, Çağlar S, Ata N, Ulus T, Birdane A, Esen H. Fractal scaling of laser  
630 Doppler flowmetry time series in patients with essential hypertension. *Microvasc*  
631 *Res*. 2011; 82:291–5.
- 632 33. Zeng H, He X, Tuo Q, Liao D, Zhang G, Chen J. LPS causes pericyte loss and  
633 microvascular dysfunction via disruption of Sirt3/angiopoietins/Tie-2 and HIF-  
634 2 $\alpha$ /Notch3 pathways. *Sci Rep*. 2016; 6:20931.
- 635 34. Reho JJ, Zheng X, Asico LD, Fisher SA. Redox signaling and splicing dependent  
636 change in myosin phosphatase underlie early versus late changes in NO  
637 vasodilator reserve in a mouse LPS model of sepsis. *Am J Physiol - Heart Circ*  
638 *Physiol*. 2015; 308:H1039–50.
- 639 35. Vanhoutte PM. Endothelium and control of vascular function. State of the Art  
640 lecture. *Hypertens Dallas Tex* 1979. 1989; 13:658–67.



- 641 36. Clemmer TP, Fisher CJ, Bone RC, Slotman GJ, Metz CA, Thomas FO.  
642 Hypothermia in the sepsis syndrome and clinical outcome. The  
643 Methylprednisolone Severe Sepsis Study Group. *Crit Care Med.* 1992; 20:1395–  
644 401.
- 645 37. Steiner AA, Fonseca MT, Soriano FG. Should we assume that hypothermia is a  
646 dysfunction in sepsis? *Crit Care.* 2017; 21.
- 647 38. Luheshi GN. Cytokines and fever. Mechanisms and sites of action. *Ann N Y Acad*  
648 *Sci.* 1998; 856:83–9.
- 649 39. Lawrence T, Natoli G. Transcriptional regulation of macrophage polarization:  
650 enabling diversity with identity. 2011; 11:750–61.
- 651 40. Tracey KJ, Beutler B, Lowry SF, Merryweather J, Wolpe S, Milsark IW, et al.  
652 Shock and tissue injury induced by recombinant human cachectin. *Science.* 1986;  
653 234:470–4.
- 654 41. da Costa LHA, Júnior NNDS, Catalão CHR, Sharshar T, Chrétien F, da Rocha  
655 MJA. Vasopressin Impairment During Sepsis Is Associated with Hypothalamic  
656 Intrinsic Apoptotic Pathway and Microglial Activation. *Mol Neurobiol.* 2017;  
657 54:5526–33.
- 658 42. Pavlov VA, Tracey KJ. Neural circuitry and immunity. *Immunol Res.* 2015;  
659 63:38–57.
- 660 43. Nance DM, Sanders VM. Autonomic innervation and regulation of the immune  
661 system (1987-2007). *Brain Behav Immun.* 2007; 21:736–45.
- 662 44. Suzuki S, Oh C, Nakano K. Pituitary-dependent and -independent secretion of CS  
663 caused by bacterial endotoxin in rats. *Am J Physiol.* 1986; 250:E470-474.
- 664 45. Osborn JW, England SK. Normalization of arterial pressure after barodenervation:  
665 role of pressure natriuresis. *Am J Physiol.* dezembro de 1990; 259:R1172-1180.
- 666 46. Wenker IC, Abe C, Viar KE, Stornetta DS, Stornetta RL, Guyenet PG. Blood  
667 pressure regulation by the rostral ventrolateral medulla in conscious rats: effects of  
668 hypoxia, hypercapnia, baroreceptor denervation, and anesthesia. *J Neurosci Off J*  
669 *Soc Neurosci.* 2017; 37:4565–83.
- 670 47. Krieger EM. Neurogenic hypertension in the rat. *Circ Res.* 1964; 15:511–21.
- 671 48. Dias DPM, Silva LEV, Katayama PL, Silva C a. A, Salgado HC, Fazan R.  
672 Correlation between RR, inter-systolic and inter-diastolic intervals and their  
673 differences for the analysis of spontaneous heart rate variability. *Physiol Meas.*  
674 2016; 37:1120–8.
- 675 49. Duque JJ, Silva LEV, Murta LO. Open architecture software platform for  
676 biomedical signal analysis. *Conf Proc Annu Int Conf IEEE Eng Med Biol Soc*  
677 *IEEE Eng Med Biol Soc Annu Conf.* 2013; 2013:2084–7.

- 678 50. Welch PD. The use of fast Fourier transform for the estimation of power spectra: a  
679 method based on time averaging over short, modified periodograms. *IEEE Trans*  
680 *Audio Electroacoust* Vol AU-15 P 70-73. 1967; 15:70-3.
- 681 51. Porta A, Tobaldini E, Guzzetti S, Furlan R, Montano N, Gnecci-Ruscione T.  
682 Assessment of cardiac autonomic modulation during graded head-up tilt by  
683 symbolic analysis of heart rate variability. *Am J Physiol Heart Circ Physiol*. 2007;  
684 293:H702-708.
- 685 52. Peng CK, Havlin S, Stanley HE, Goldberger AL. Quantification of scaling  
686 exponents and crossover phenomena in nonstationary heartbeat time series. *Chaos*  
687 *Woodbury N*. 1995; 5:82-7.
- 688 53. Costa M, Goldberger AL, Peng C-K. Multiscale entropy analysis of biological  
689 signals. *Phys Rev E*. 2005; 71:021906.
- 690 54. Goldberger AL, Peng C-K, Lipsitz LA. What is physiologic complexity and how  
691 does it change with aging and disease? *Neurobiol Aging*. 2002; 23:23-6.
- 692 55. Pikkujämsä SM, Mäkikallio TH, Sourander LB, Räihä IJ, Puukka P, Skyttä J, et al.  
693 Cardiac interbeat interval dynamics from childhood to senescence: comparison of  
694 conventional and new measures based on fractals and chaos theory. *Circulation*.  
695 1999; 100:393-9.
- 696 56. Mulvany MJ, Halpern W. Contractile properties of small arterial resistance vessels  
697 in spontaneously hypertensive and normotensive rats. *Circ Res*. 1977; 41:19-26.
- 698 57. Haack D, Vecsei P, Lichtwald K, Vielhauer W. Corticosteroid and corticosteroid  
699 metabolite levels in animals immunized against corticosteroids. *J Steroid Biochem*.  
700 1979; 11:971-80.

701

702

## 703 LIST OF FIGURES

704 **Fig. 1.** Effects of sino-aortic denervation (SAD) on mean arterial pressure (MAP), and  
705 heart rate (HR) of saline (Sal)-treated rats (panel A) and rats with SI (panel B, LPS,  
706 1.5 mg.kg<sup>-1</sup>). Bradycardic gain during stimulation of the arterial baroreceptors (panel C)  
707 and maximal hypotensive response to LPS-induced SI (panel D). Representative  
708 recordings showing PAP, MAP (white line; top) and HR responses to i.v. injection of  
709 phenylephrine (Phe; panel E).  $\Delta$  Tb (panel F) and thermal indexes (panel G). Results are  
710 presented as individual values and mean  $\pm$  SEM. \*, #  $p < 0.05$  compared with time zero  
711 and  $\tau$   $p < 0.0001$  difference between groups using the two-way ANOVA with  
712 Bonferroni's post hoc test (panel A and B). \* $p < 0.05$  using the unpaired t test (panel C  
713 and D). \*\* $p < 0.01$  compared with Control + Sal group using the one-way ANOVA with  
714 Bonferroni's post hoc test (panel G). Control + Sal ( $n = 5-7$ ), Control + LPS ( $n = 7-9$ ),  
715 SAD + Sal ( $n = 5-9$ ), and SAD + LPS ( $n = 8-9$ ).

716

717 **Fig. 2.** Variability in heart rate (HR) and in systolic arterial pressure (SAP) in the time-  
718 domain during LPS-induced SI. Standard deviation (SDNN, panel A) and root mean  
719 square of the successive differences (RMSSD, panel B) from PI series. Standard deviation

720 (SD) from SAP series (panel C). Control + Sal, Control + LPS, SAD + Sal, and SAD +  
721 LPS groups were evaluated 3 and 24 hours after LPS administration. Results are presented  
722 as individual values and mean  $\pm$  SEM. \*\*  $p < 0.01$ , \*\*\*  $p < 0.001$ , \*\*\*\*  $p < 0.0001$   
723 compared with Control + Sal group using the one-way ANOVA with Bonferroni's post  
724 hoc test. Control + Sal ( $n = 9$ ), Control + LPS ( $n = 8$ ), SAD + Sal ( $n = 9$ ), and SAD + LPS  
725 ( $n = 7$ ).

726

727 **Fig. 3:** Power spectral analyses of pulse interval (PI) and systolic arterial pressure (SAP)  
728 from Control + Sal, Control + LPS, SAD + Sal, and SAD + LPS groups. Representative  
729 tracings from each experimental group (panel A and B). Magnitude of low frequency (LF,  
730 panel C) and high frequency (HF, panel D) components of PI. Magnitude of HF  
731 component of LF component of PI (panel E). Results are presented as individual values  
732 and mean  $\pm$  SEM. \*\*  $p < 0.01$ , and \*\*\*\*  $p < 0.0001$  compared with Control + Sal group  
733 using the one-way ANOVA with Bonferroni's post hoc test. Control + Sal ( $n = 8-9$ ),  
734 Control + LPS ( $n = 8-9$ ), SAD + Sal ( $n = 8-9$ ), and SAD + LPS ( $n = 8-9$ ).

735

736 **Fig. 4:** Detrended fluctuation analysis (DFA) from Control + Sal, Control + LPS, SAD +  
737 Sal, and SAD + LPS groups that were evaluated 3 hours after LPS administration.  
738 Average values of  $\alpha_1$  (panel A),  $\alpha_2$  (panel B) and  $\alpha_3$  (panel C) are shown. Results are  
739 presented as individual values and mean  $\pm$  SEM. \*  $p < 0.05$ , \*\*  $p < 0.01$ , \*\*\*\*  $p < 0.0001$   
740 compared with Control + Sal group using the one-way ANOVA with Bonferroni's post  
741 hoc test. Control + Sal ( $n = 9$ ), Control + LPS ( $n = 9$ ), SAD + Sal ( $n = 8$ ), and SAD + LPS  
742 ( $n = 9$ ).

743

744 **Fig. 5:** Multiscale entropy (MSE) from Control + Sal, Control + LPS, SAD + Sal and,  
745 SAD + LPS groups that were evaluated 3 hours after LPS administration. Mean MSE  
746 profiles obtained from Control + Sal, SAD + Sal (panel A), Control + LPS, and SAD +  
747 LPS (panel B). Average values of entropy calculated for scales 1 and 2, 3 to 7 and 8 to 20  
748 are shown (panel C). Results are presented as individual values and mean  $\pm$  SEM. \*  $p <$   
749  $0.05$ , \*\*  $p < 0.01$ , \*\*\*  $p < 0.001$ , \*\*\*\*  $p < 0.0001$  compared with Control + Sal group  
750 using the one-way ANOVA with Bonferroni's post hoc test. Control + Sal ( $n = 9$ ), Control  
751 + LPS ( $n = 9$ ), SAD + Sal ( $n = 9$ ), and SAD + LPS ( $n = 9$ ).

752

753 **Fig. 6:** Vasoconstrictor responses to KCl (120 mM, panel A) from Control + Sal, Control  
754 + LPS, SAD + Sal and, SAD + LPS groups. Cumulative concentration-response curves  
755 to the  $\alpha$ -1 adrenergic agonist [phenylephrine (Phe) panel B], Phe in presence of L-NAME,  
756 non-selective inhibitor of nitric oxide synthase, ( $10^{-4}$  M, panel C), Acetylcholine (ACh),  
757 endothelium-dependent vasodilator (panel D), sodium nitroprusside (SNP) endothelium-  
758 independent vasodilator (panel E). \*  $p < 0.05$  compared with Control + Sal group using  
759 the one-way ANOVA with Bonferroni's post hoc test. Control + Sal ( $n = 4-5$ ), Control +  
760 LPS ( $n = 5$ ), SAD + Sal ( $n = 4$ ), and SAD + LPS ( $n = 5$ ).

761

762 **Fig. 7:** Electrical-field stimulation (EFS, panel A) from Control + Sal, Control + LPS,  
763 SAD + Sal and, SAD + LPS groups. EFS in presence of L-NAME ( $10^{-4}$  M, panel F) in  
764 resistance mesenteric arteries. Results are presented as mean  $\pm$  SEM \*  $p < 0.05$  compared  
765 with Control + Sal group using the one-way ANOVA with Bonferroni's post hoc test.  
766 Control + Sal ( $n = 4-5$ ), Control + LPS ( $n = 5$ ), SAD + Sal ( $n = 4$ ), and SAD + LPS ( $n =$   
767  $5$ ).

768

769 **Fig. 8:** Plasma (panel A, B, C, and D) and splenic levels (E, F, G, and H) of pro-  
770 inflammatory and anti-inflammatory cytokines from Control + Sal, Control + LPS, SAD  
771 + Sal and SAD + LPS groups. Results are presented as individual values and mean  $\pm$   
772 SEM. \*  $p < 0.05$ , \*\*  $p < 0.01$ , \*\*\*  $p < 0.001$ , \*\*\*\*  $p < 0.0001$  compared with Control +  
773 Sal group. #  $p < 0.05$  and ##  $p < 0.01$  compared with Control + LPS group using the one-  
774 way ANOVA with Bonferroni's post hoc test or or Kruskal-Wallis test followed by  
775 Dunn's post hoc test. Control + Sal ( $n = 8-12$ ), Control + LPS ( $n = 9-10$ ), SAD + Sal ( $n =$   
776 5), and SAD + LPS ( $n = 7-13$ ).

777

778 **Fig. 9:** Plasma levels of corticosterone (panel A), NO<sub>x</sub> (nitrate, panel B), and  
779 norepinephrine (panel C) from Control + Sal, Control + LPS, SAD + Sal and SAD + LPS  
780 groups. Results are presented as individual values and mean  $\pm$  SEM. \*\*\*\*  $p < 0.0001$   
781 compared with Control + Sal group using the one-way ANOVA with Bonferroni's post  
782 hoc test. Control + Sal ( $n = 9$ ), Control + LPS ( $n = 8-9$ ), SAD + Sal ( $n = 5-6$ ), and SAD  
783 + LPS ( $n = 5-9$ ).

784

785 **Author Contributions:** M.R.A., J.L.D., C.A.P., G.S.B. and N.S.F. performed  
786 experiments. M.R.A., L.E.V.S. and C.A.P., analyzed the data. M.R.A., J.L.D. and  
787 L.G.S.B conceived and designed the study. M.R.A., and L.G.S.B. planned the  
788 experiments, wrote, reviewed and contributed to the final manuscript. L.G.S.B., J.A.R.,  
789 E.C.C., and R.C.T. supervised the project and provided funding. All authors reviewed the  
790 manuscript

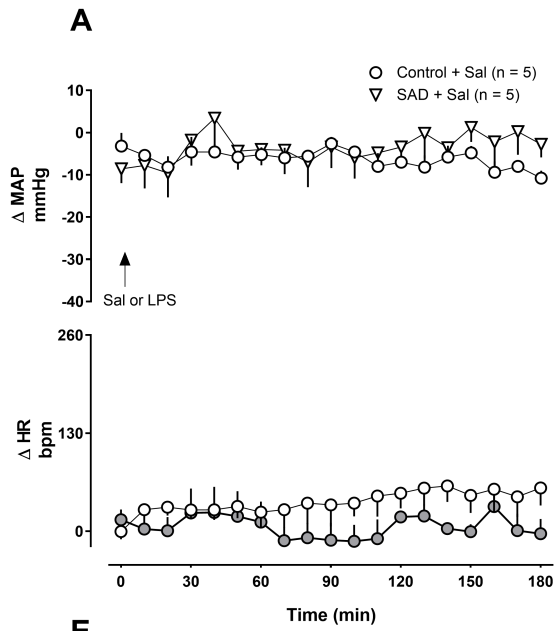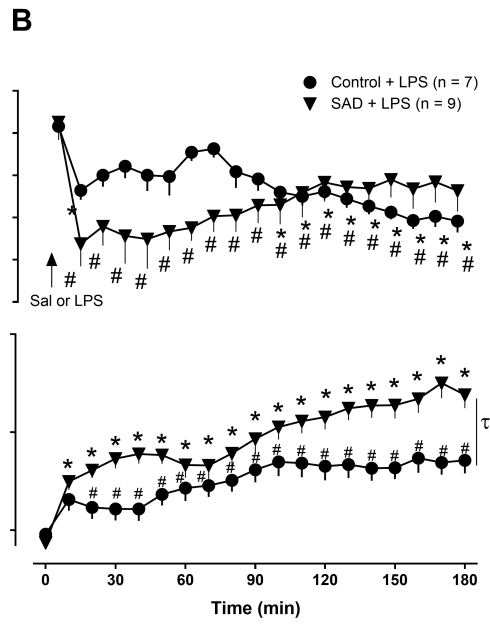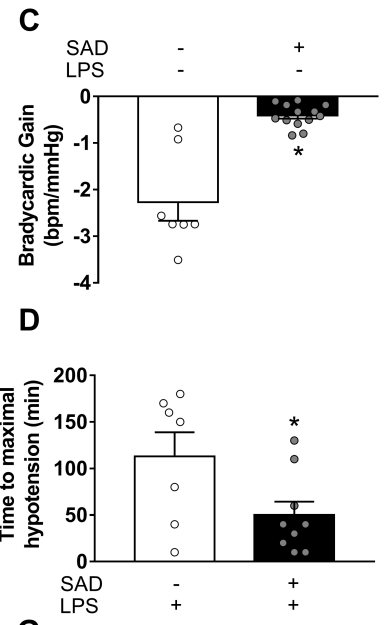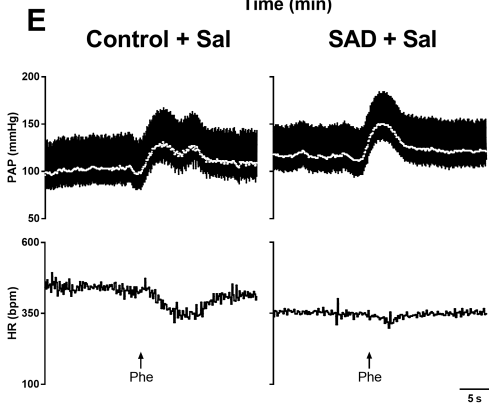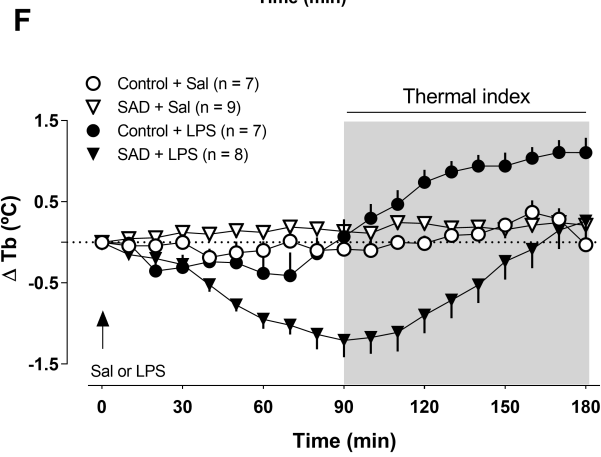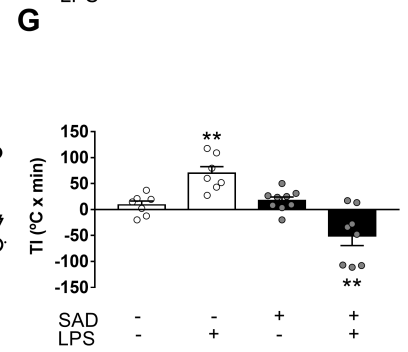

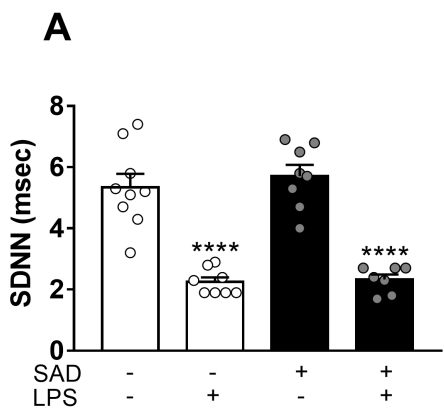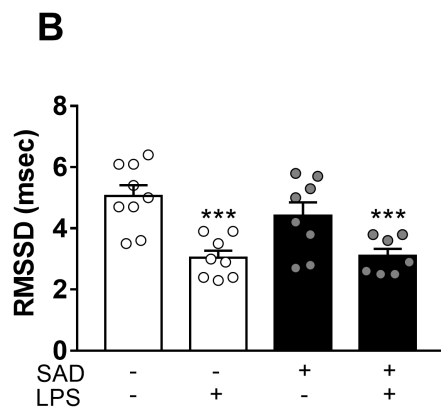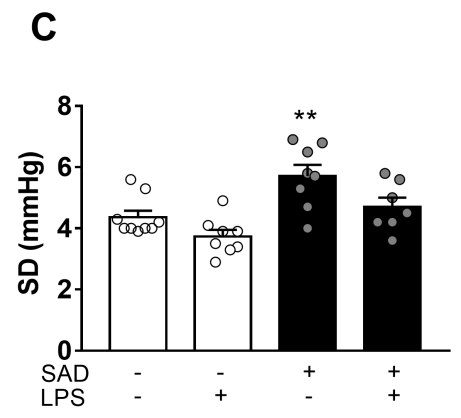

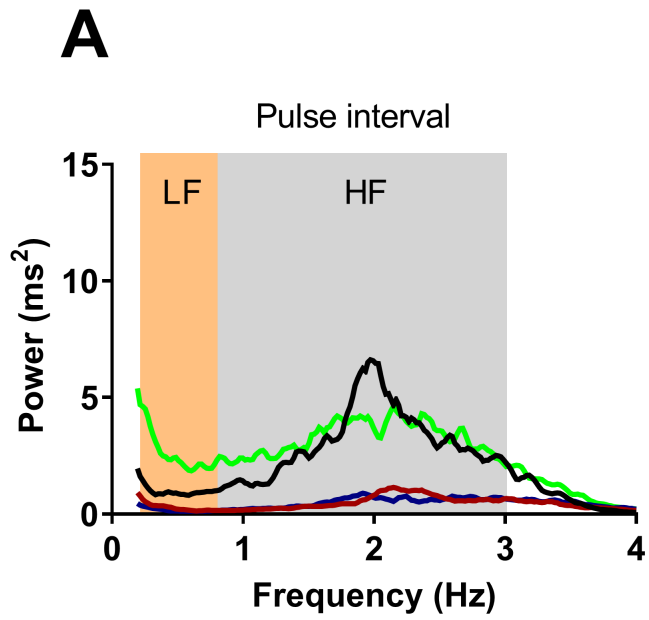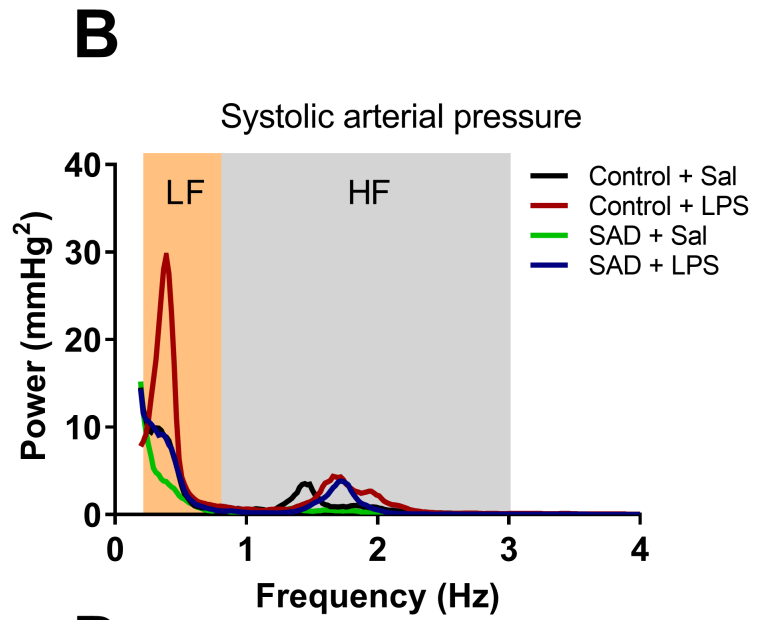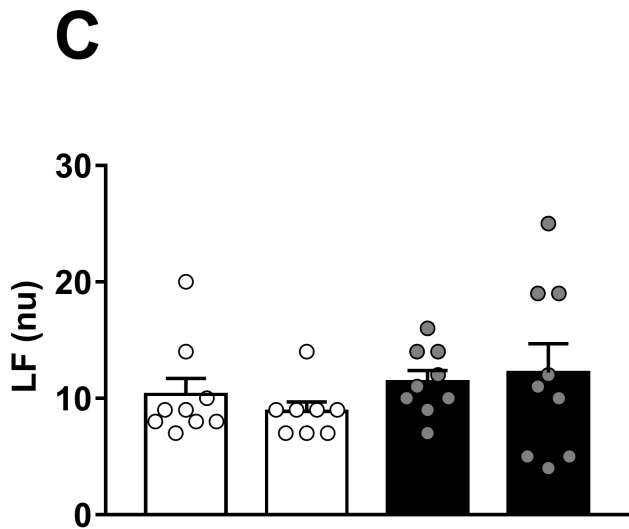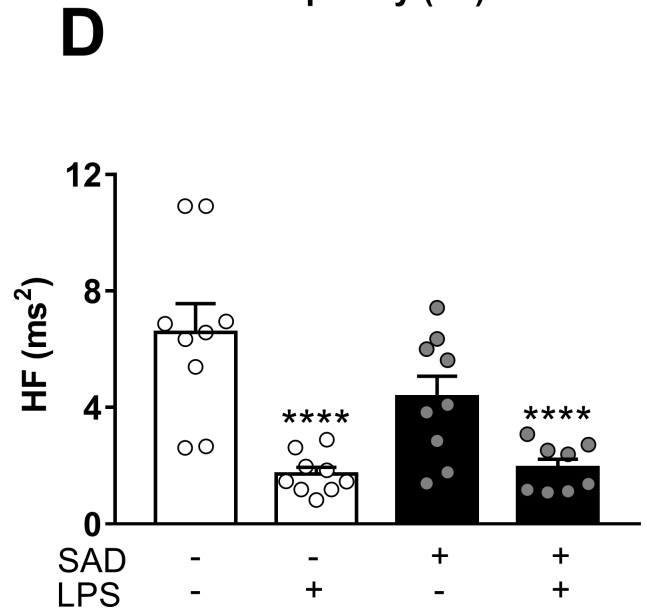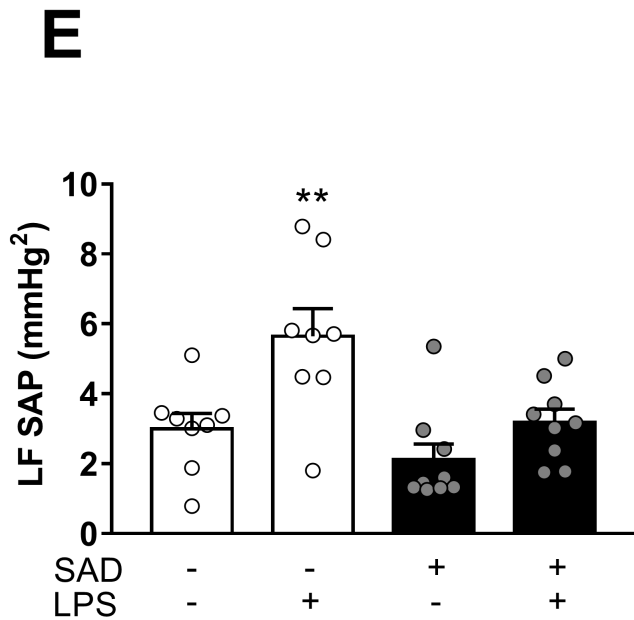

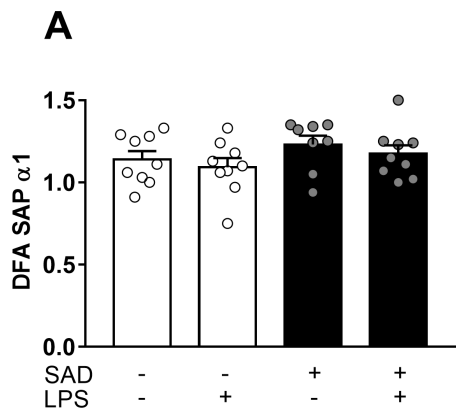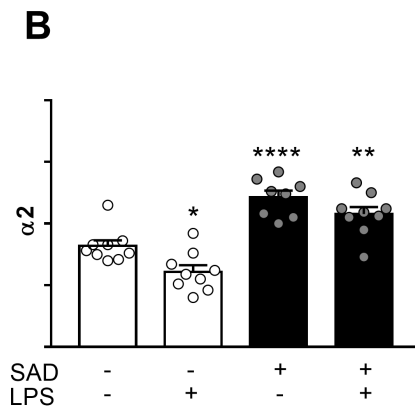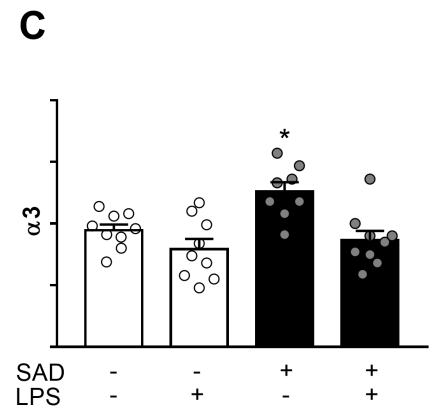



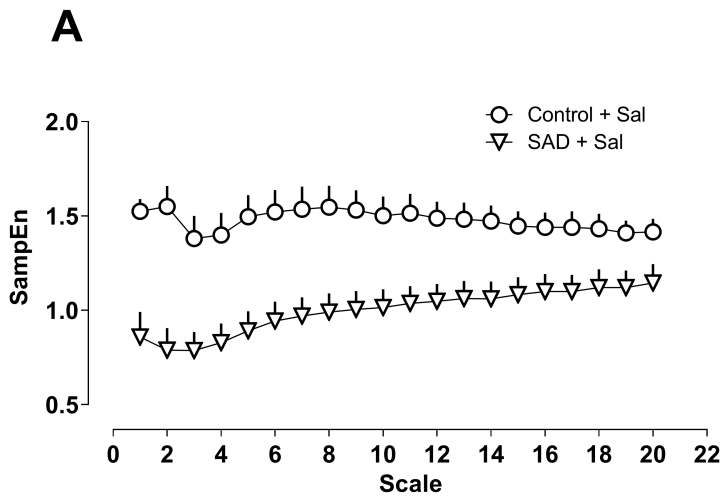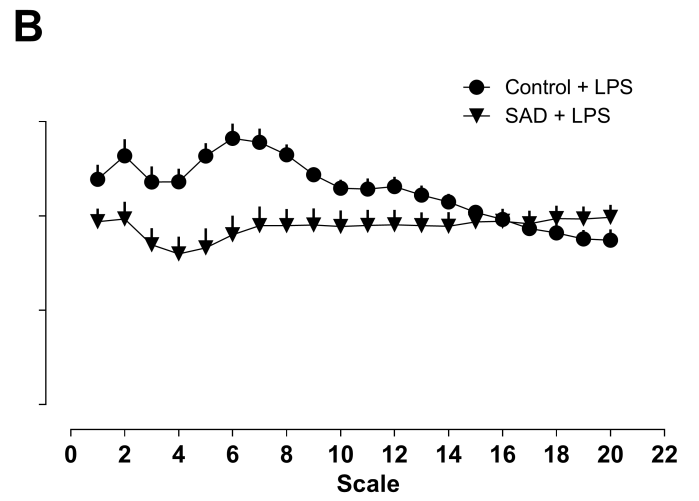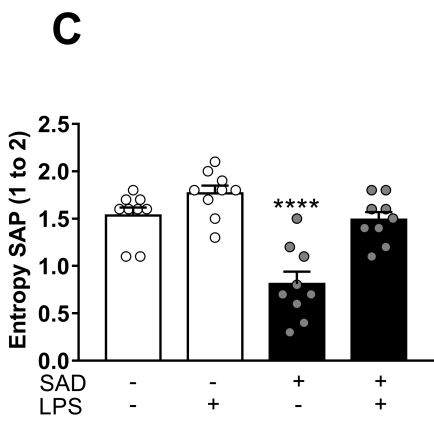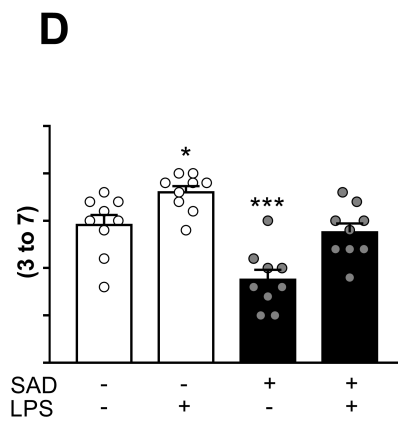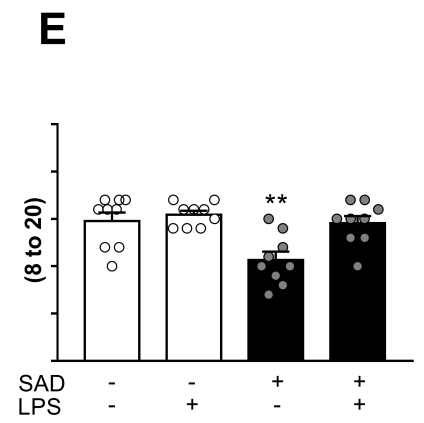

**A**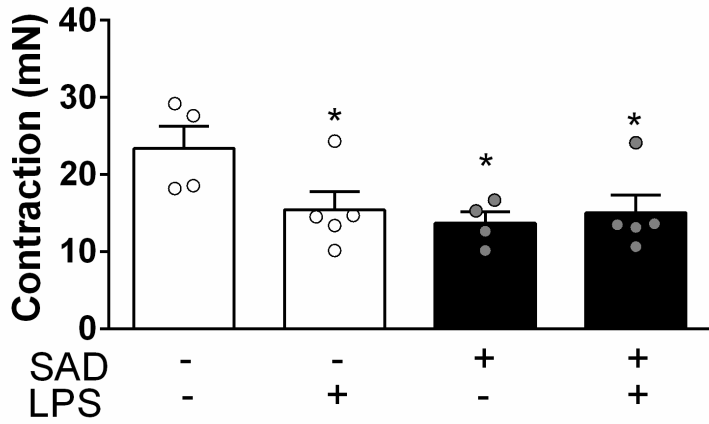**B**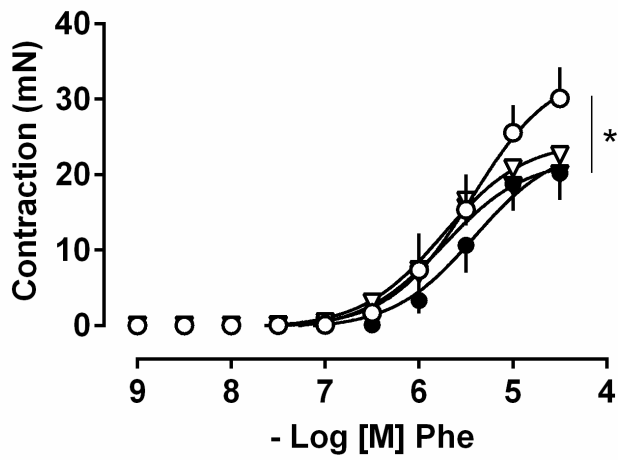**C**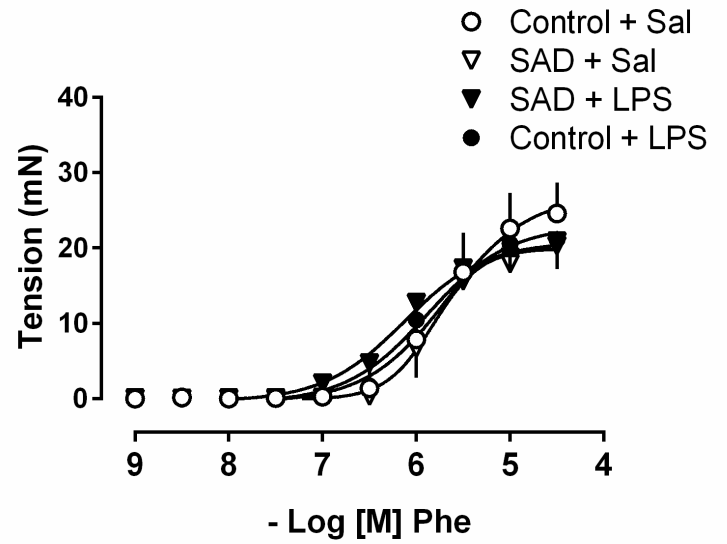**D**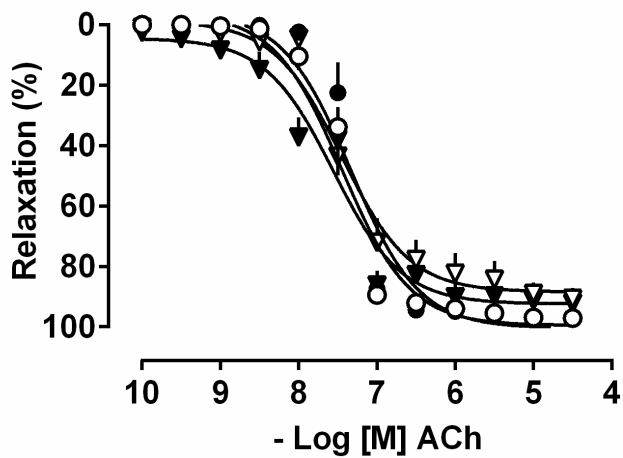**E**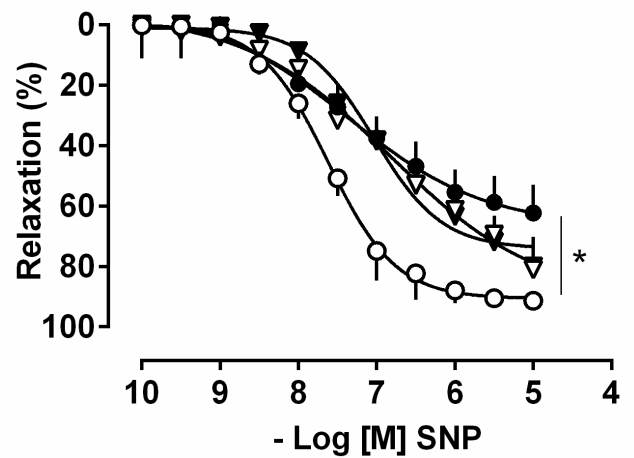

**A**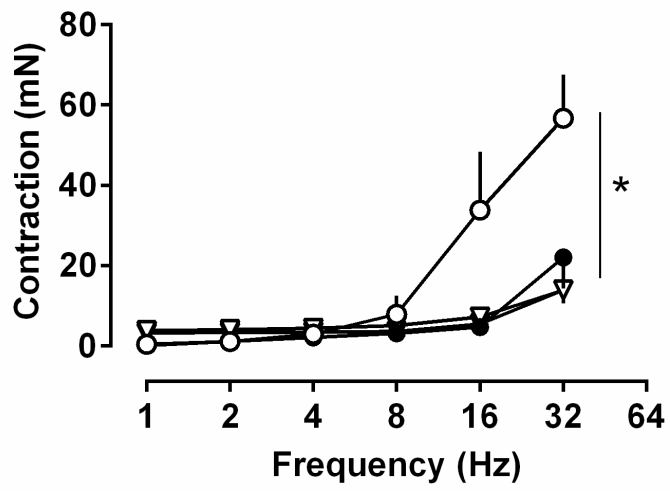**B**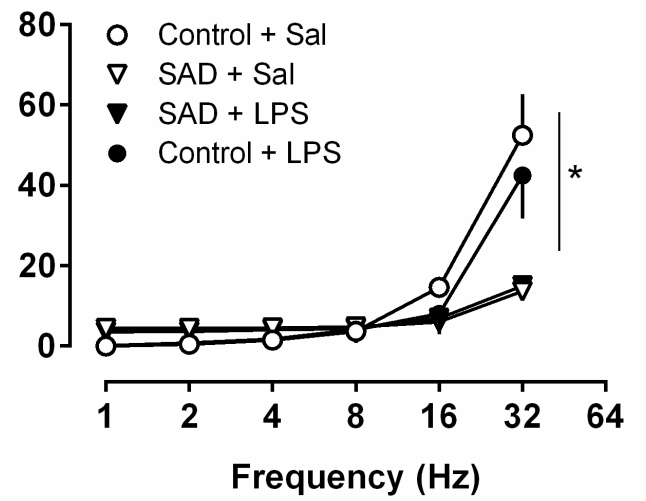

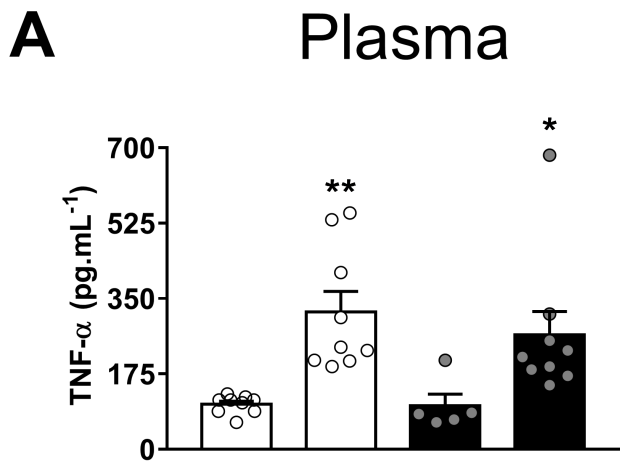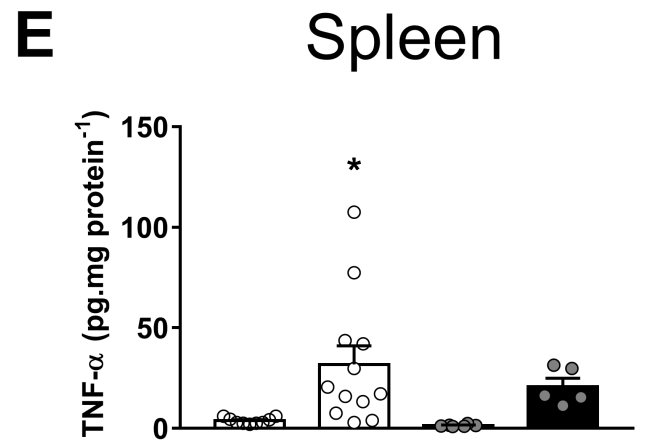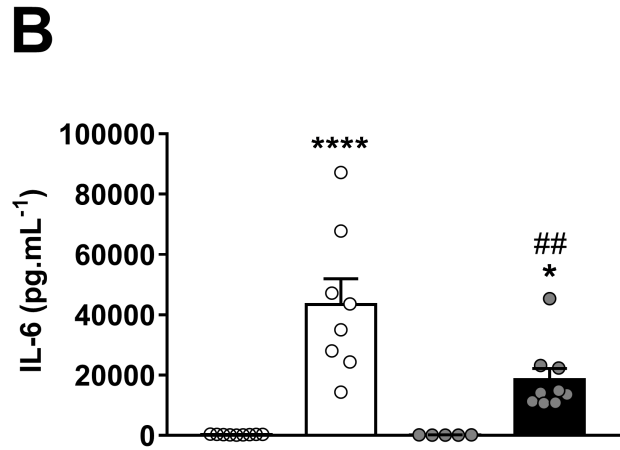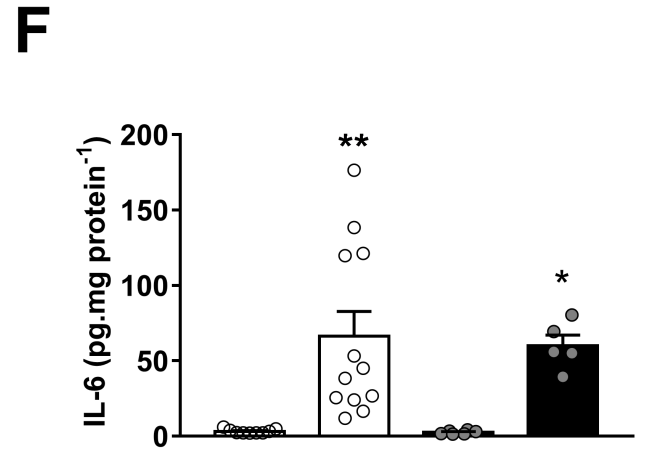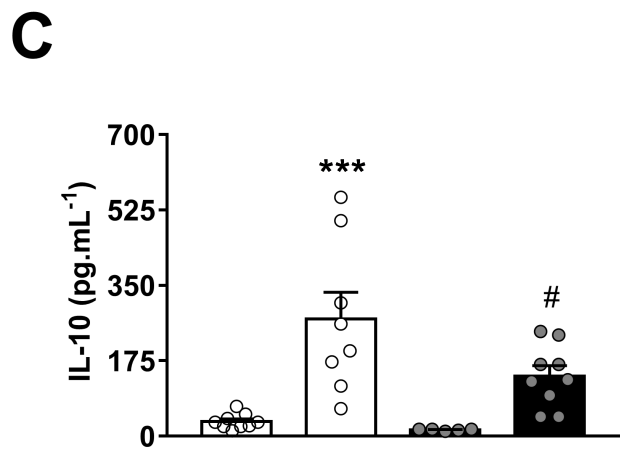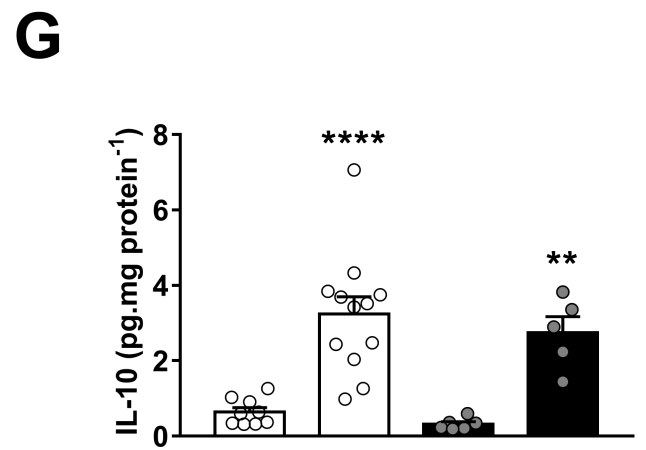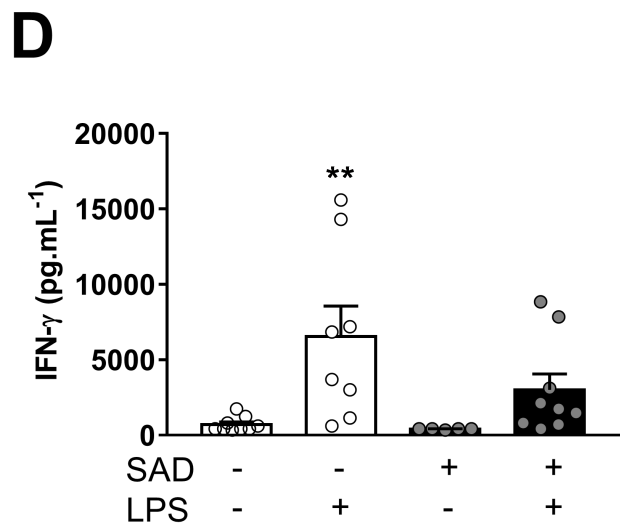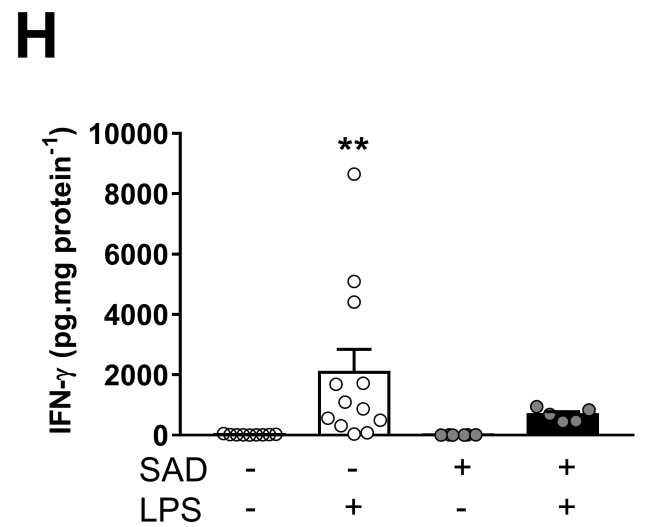

**A**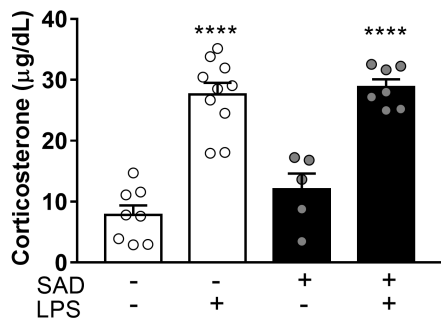**B**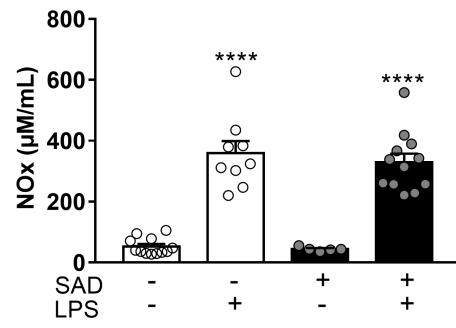**C**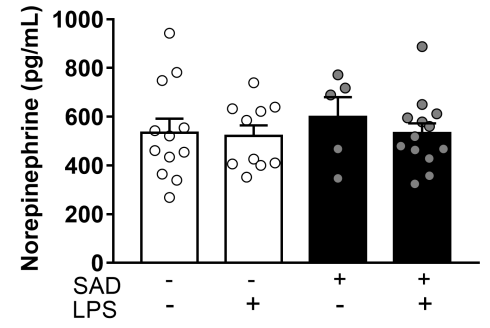

Source: https://www.biorxiv.org/content/10.1101/748608v1.full.pdf
